# Supplementary material for: Mass Cytometric Analysis of Early-Stage Mycosis Fungoides
Source: MDPI journal article supplement (doi:10.3390/cells11071062), 2022-03-22
Supplement: s1 [file s1]

## Supplementary Information

**Figure S1** Gating strategy for single, live CD45<sup>+</sup> cells on MF samples (A), and identification of the overview level of CD45<sup>+</sup> cells by HSNE analysis (B).

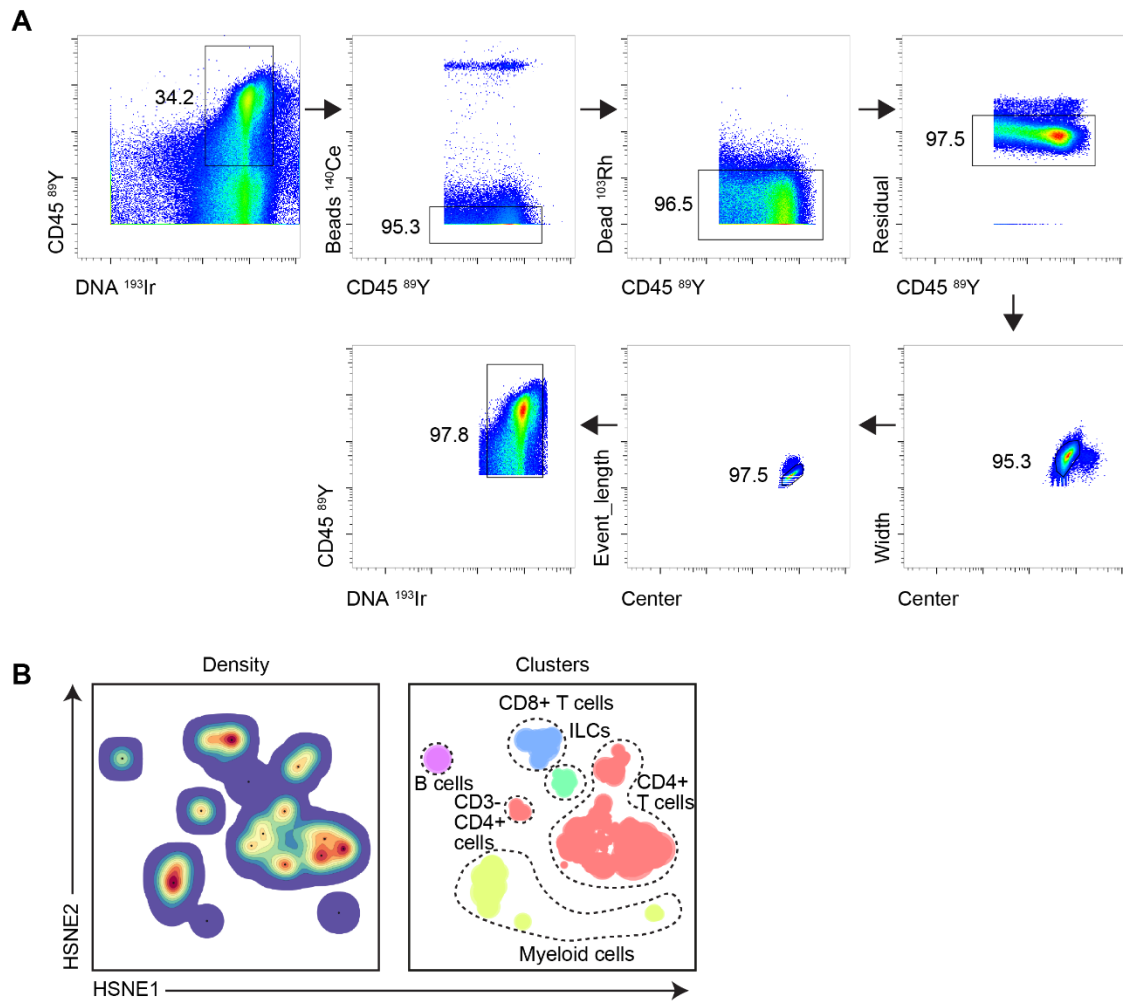

**Figure S2** A collective t-SNE was performed on CD3<sup>-</sup>CD4<sup>+</sup> T cells, and show the density map showing the local probability density of the embedded cells (left); Colors represent cluster partitions for per CD4<sup>+</sup> T cells subpopulation (right).

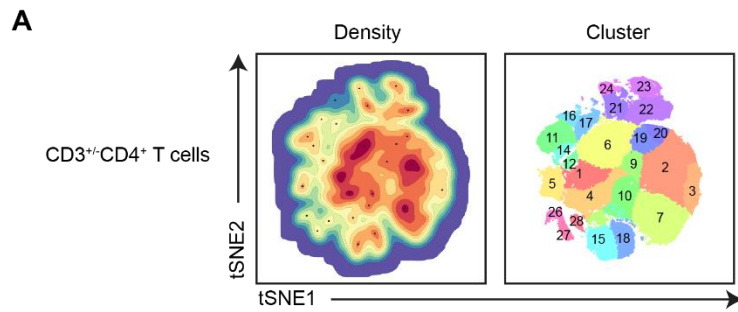

**Figure S3** Identification of phenotypically distinct clusters in the CD3<sup>+</sup>CD8<sup>+</sup> T cell compartment across MF samples. **(A)** A collective t-SNE was performed on CD8<sup>+</sup> T cells and stratified for samples (n = 10). In total, 5.1×10<sup>4</sup> CD8<sup>+</sup> T cells were analyzed in the plots. **(B)** Relative expression level of indicated immune markers. Colors represent different level of marker expression. **(C)** The density map showing the local probability density of the embedded cells (left); Colors represent cluster partitions for per CD8<sup>+</sup> T cells subpopulation (right). **(D)** Heatmap (blue-to-red scale) showing the median of marker expression values for the identified clusters and hierarchical clustering thereof; heatmap (green-to-yellow scale) showing the corresponding cell frequencies of identified clusters of total CD8<sup>+</sup> T cells in each sample. The dendrogram shows the hierarchical clustering of samples. Colors represent different samples.

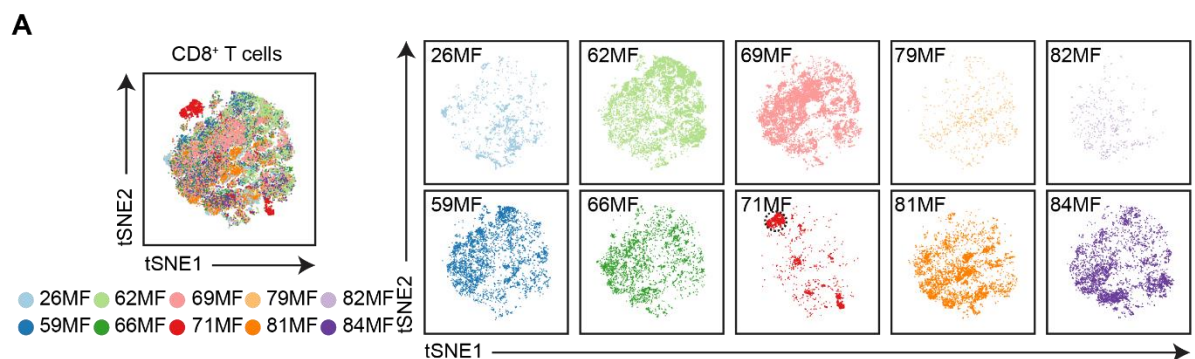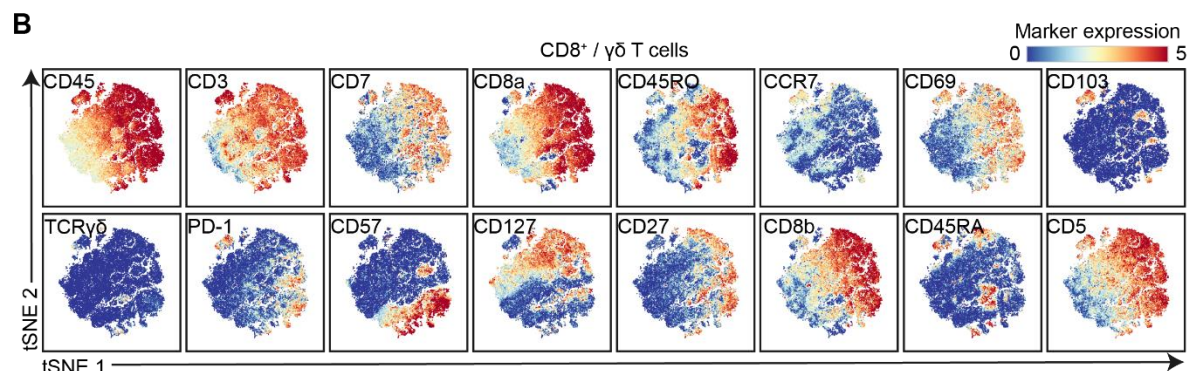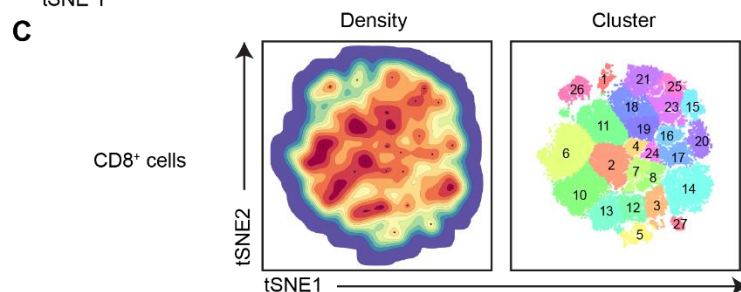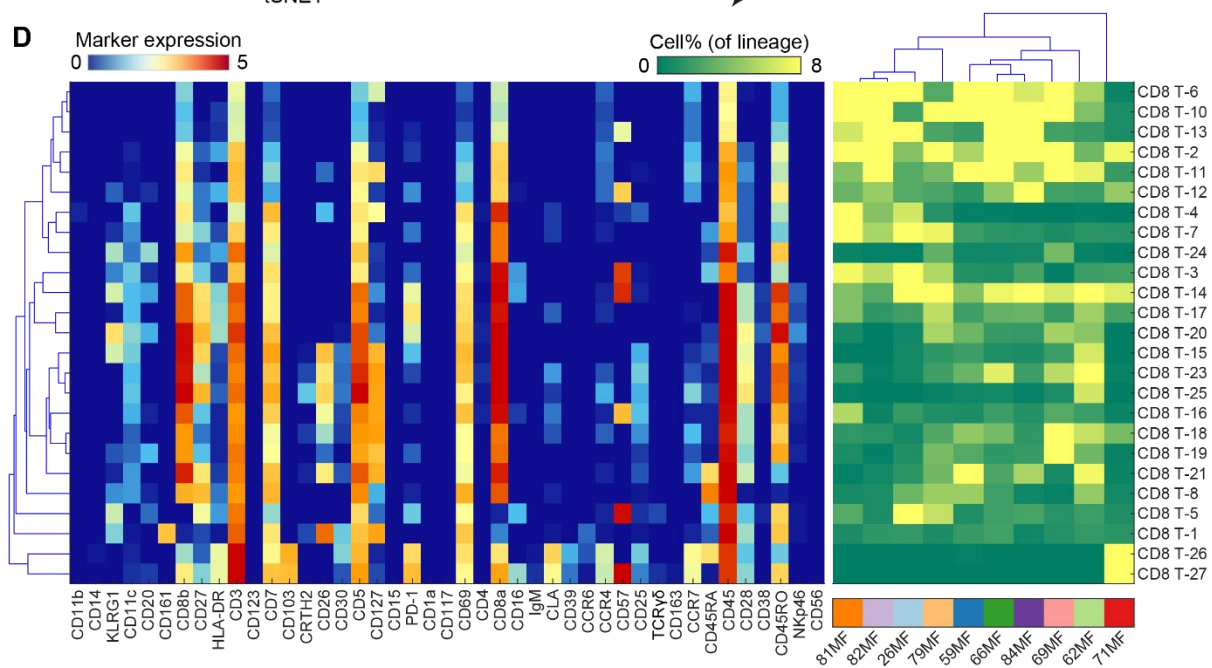

**Figure S4** A collective t-SNE was performed on myeloid cells. The density map showing the local probability density of the embedded cells (left); Colors represent cluster partitions for per myeloid cells subpopulation (right).

**A**

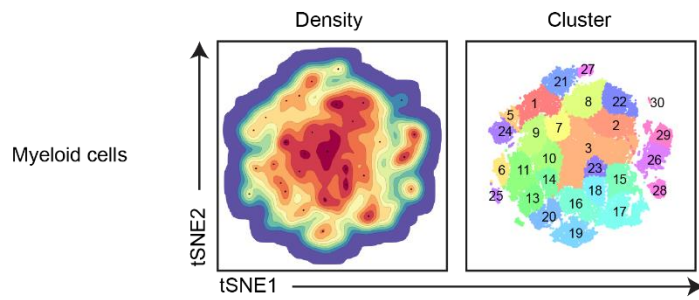

**Figure S5** Individual antibody stains for representative MF patients (120MF) by IMC.

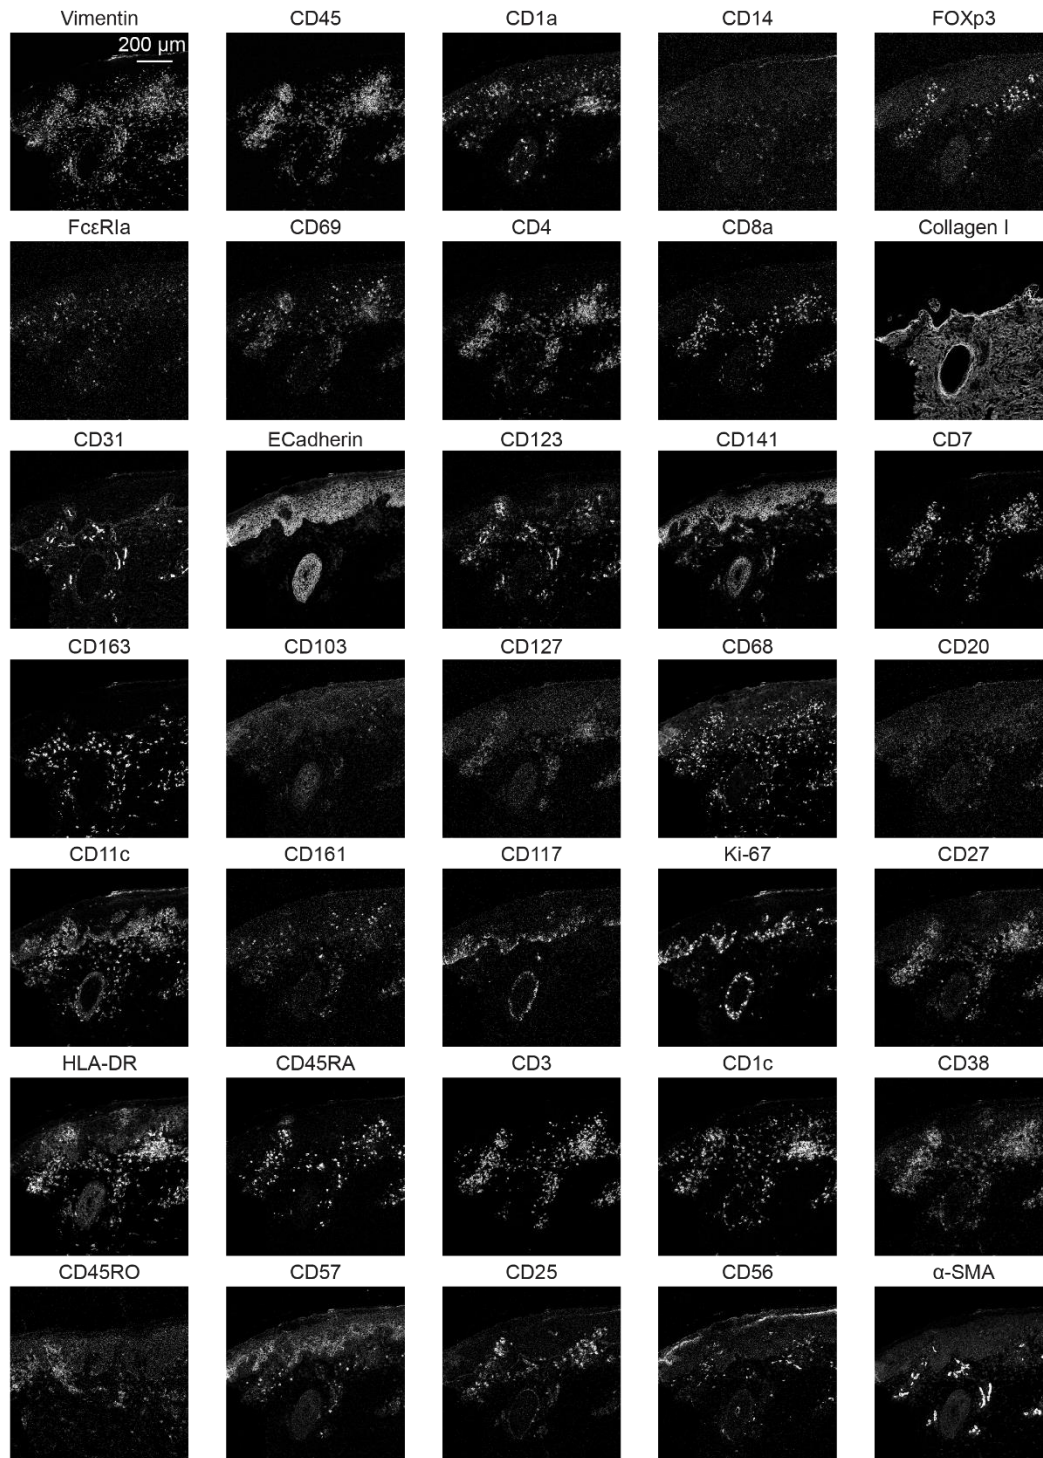



**Figure S6** Individual antibody stains for 87MF patients by IMC.

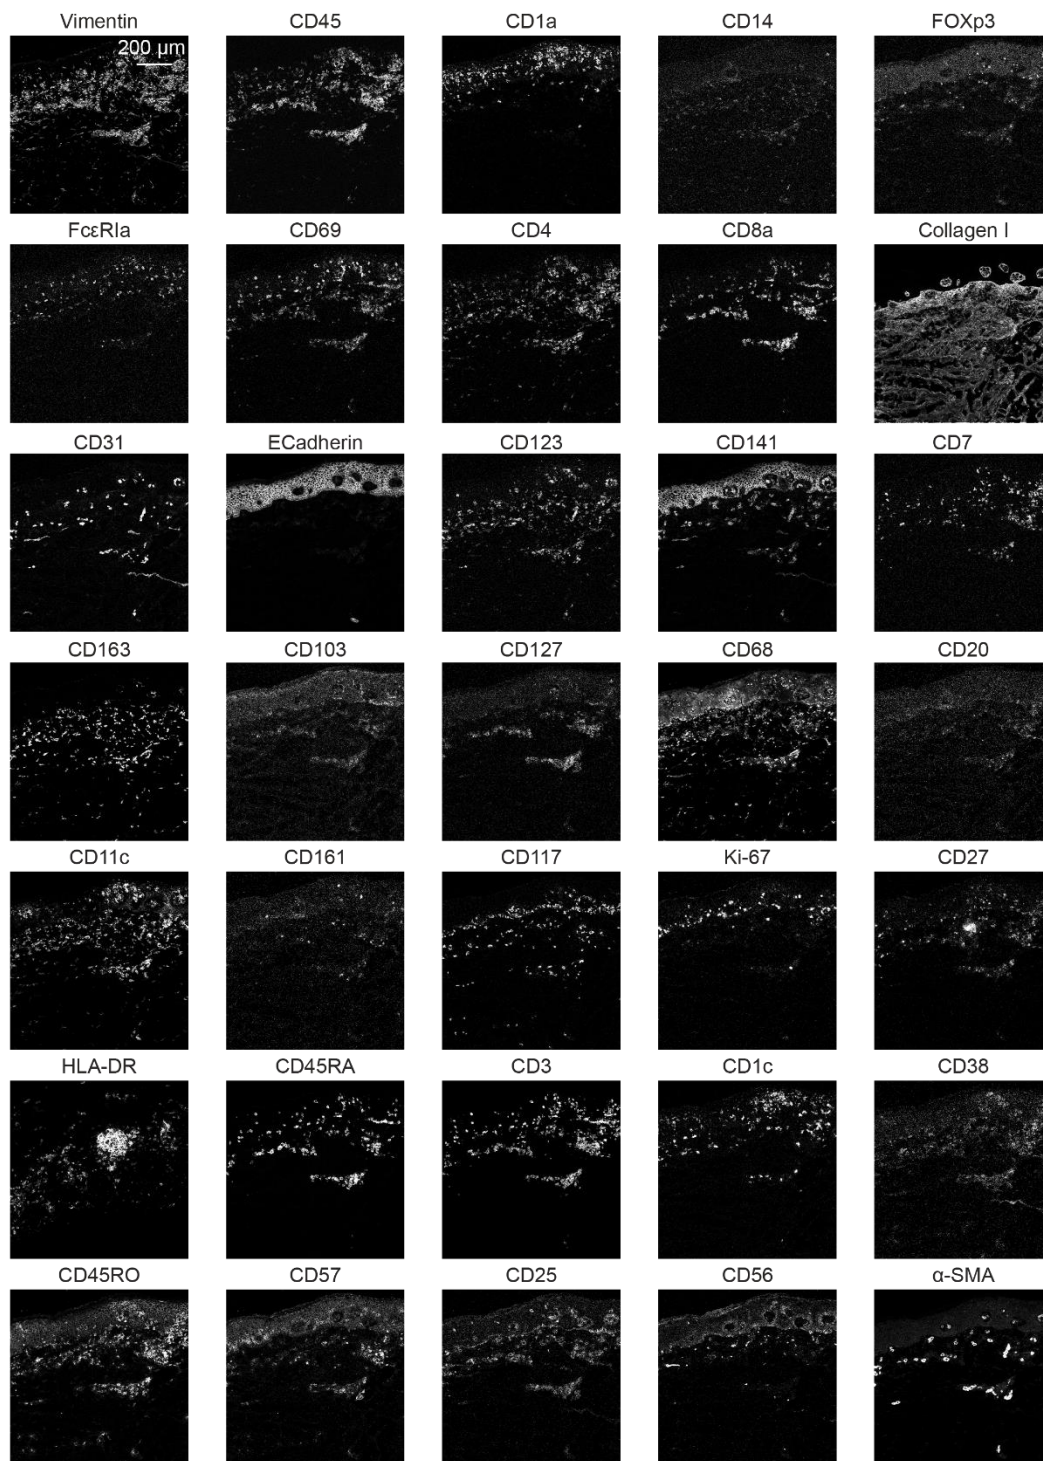

**Figure S7** Individual antibody stains for 105MF patients by IMC.

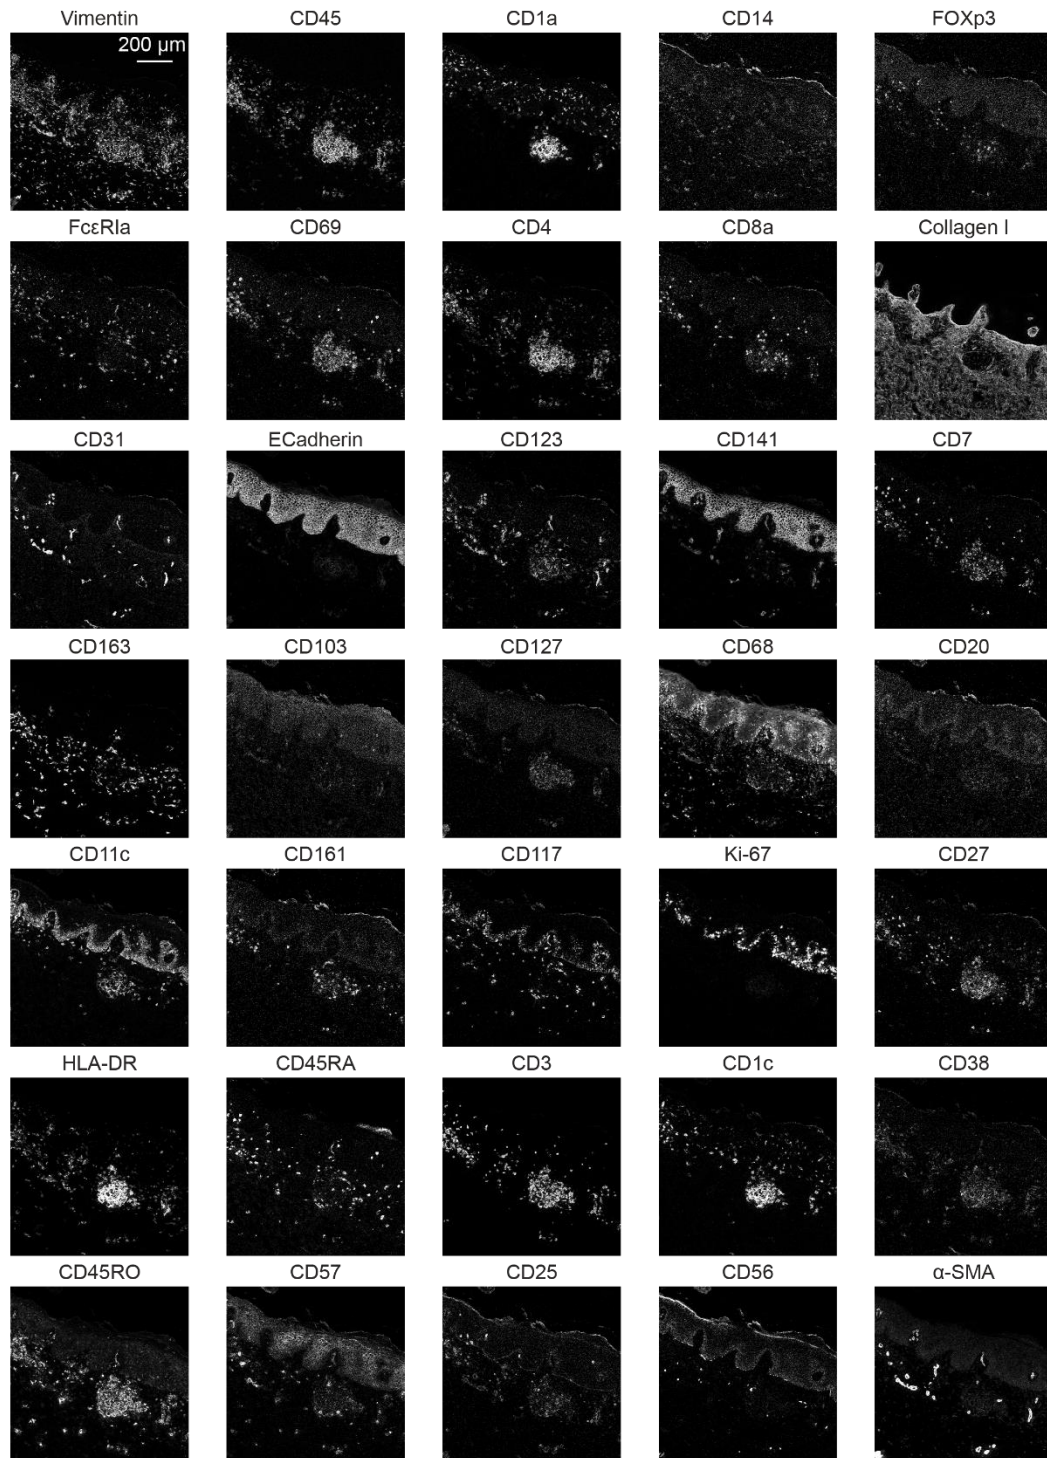



**Figure S8** Individual antibody stains for 108MF patients by IMC.

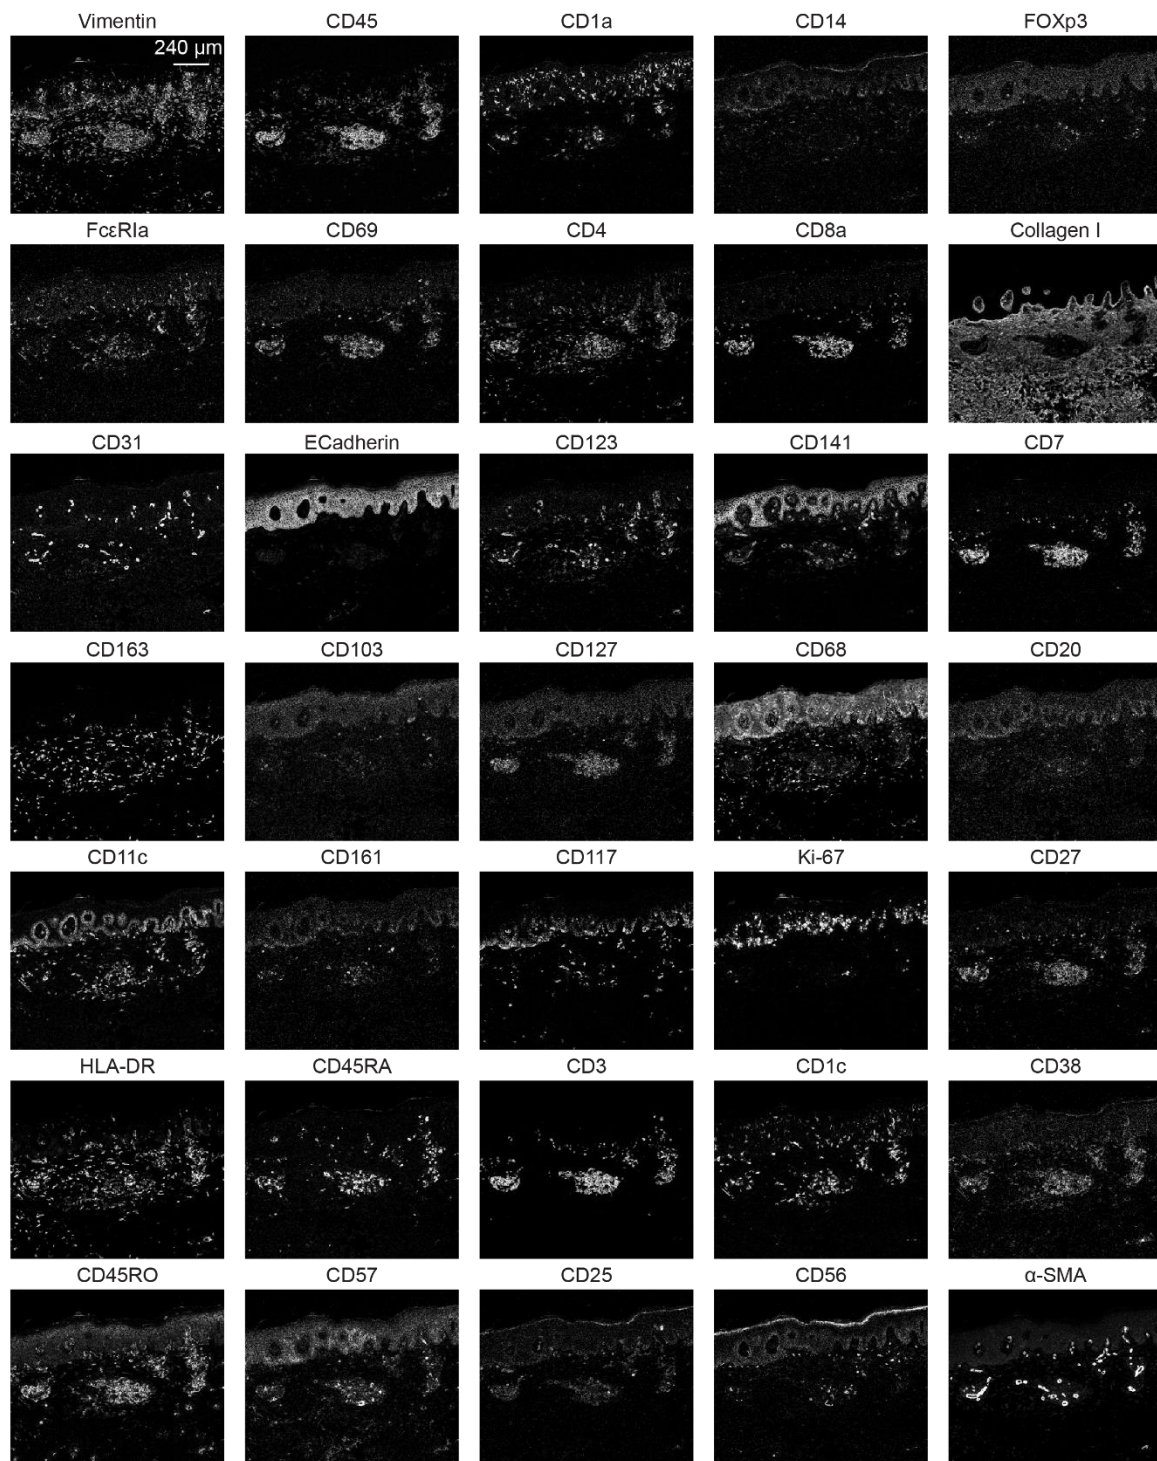

**Figure S9** Individual antibody stains for 109MF patients by IMC.

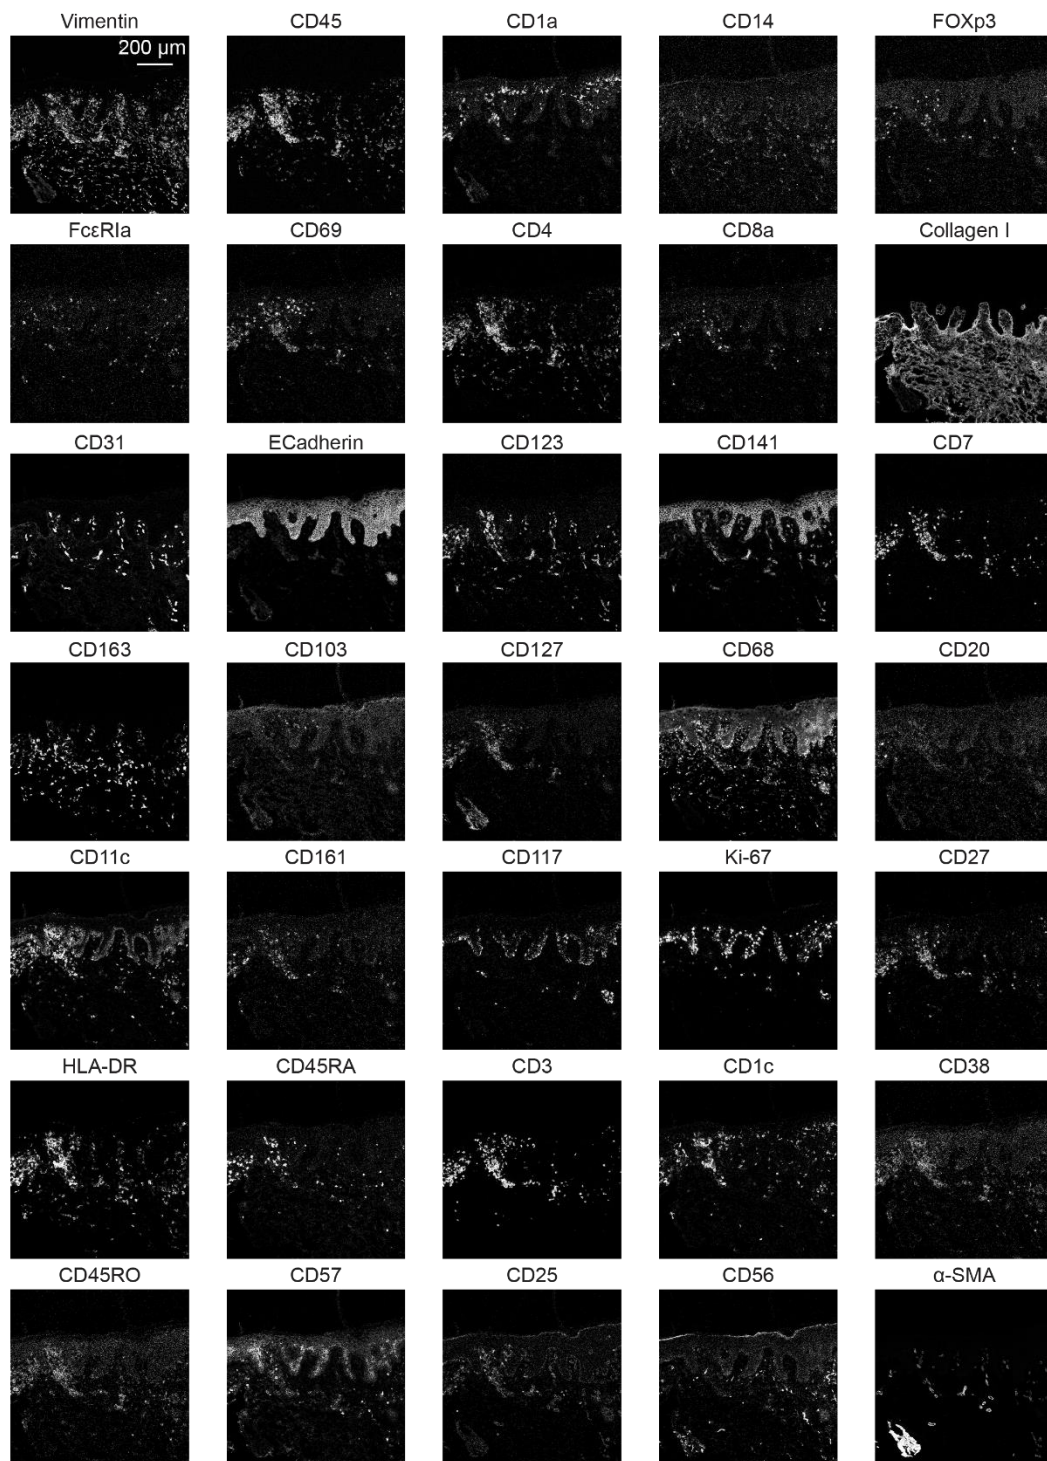

**Figure S10** Individual antibody stains for 113MF patients by IMC.

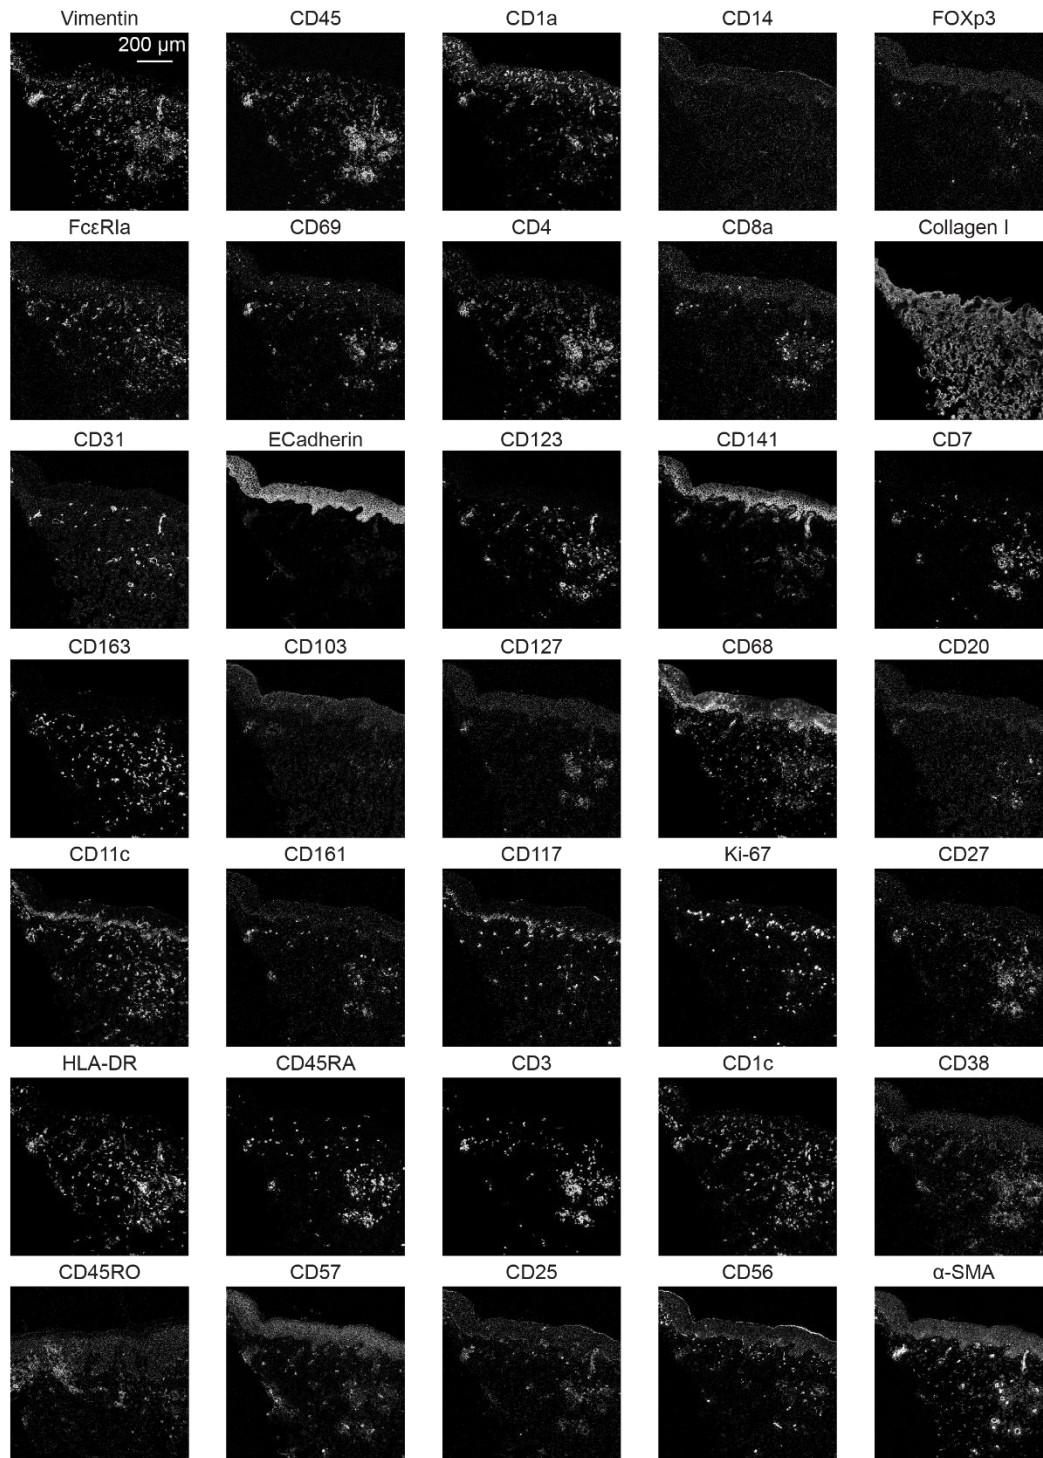



**Figure S11** Individual antibody stains for 01NS donor by IMC.

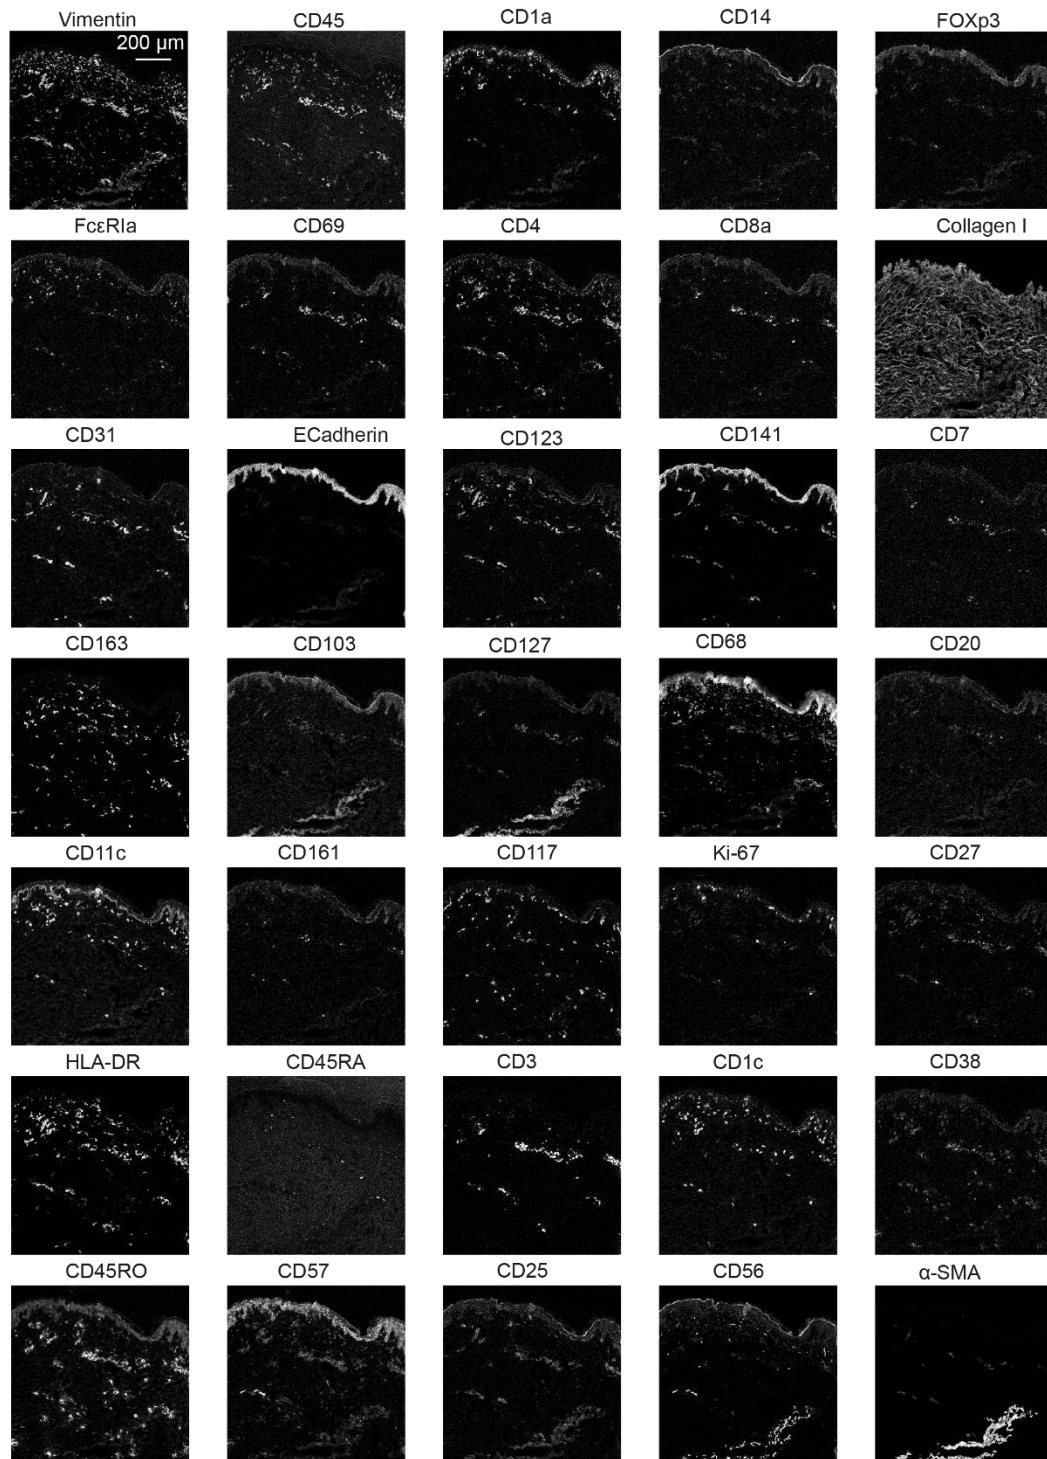

**Figure S12** Individual antibody stains for 02NS donor by IMC.

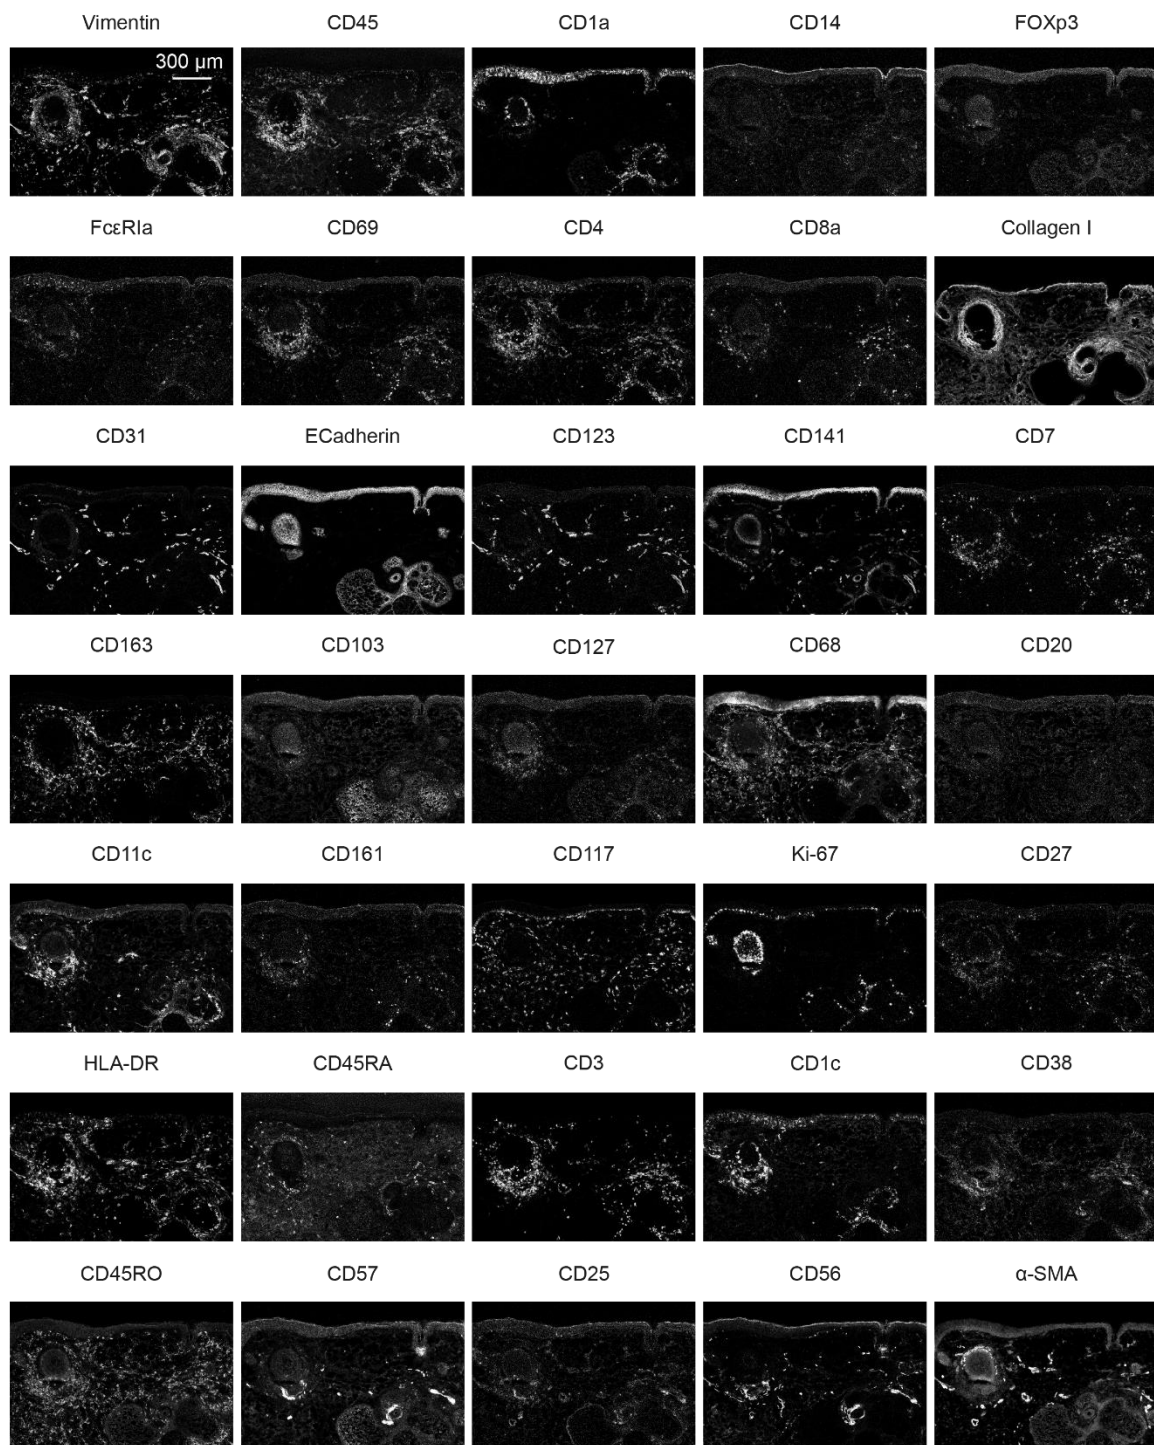



**Figure S13** Individual antibody stains for 03NS donor by IMC.

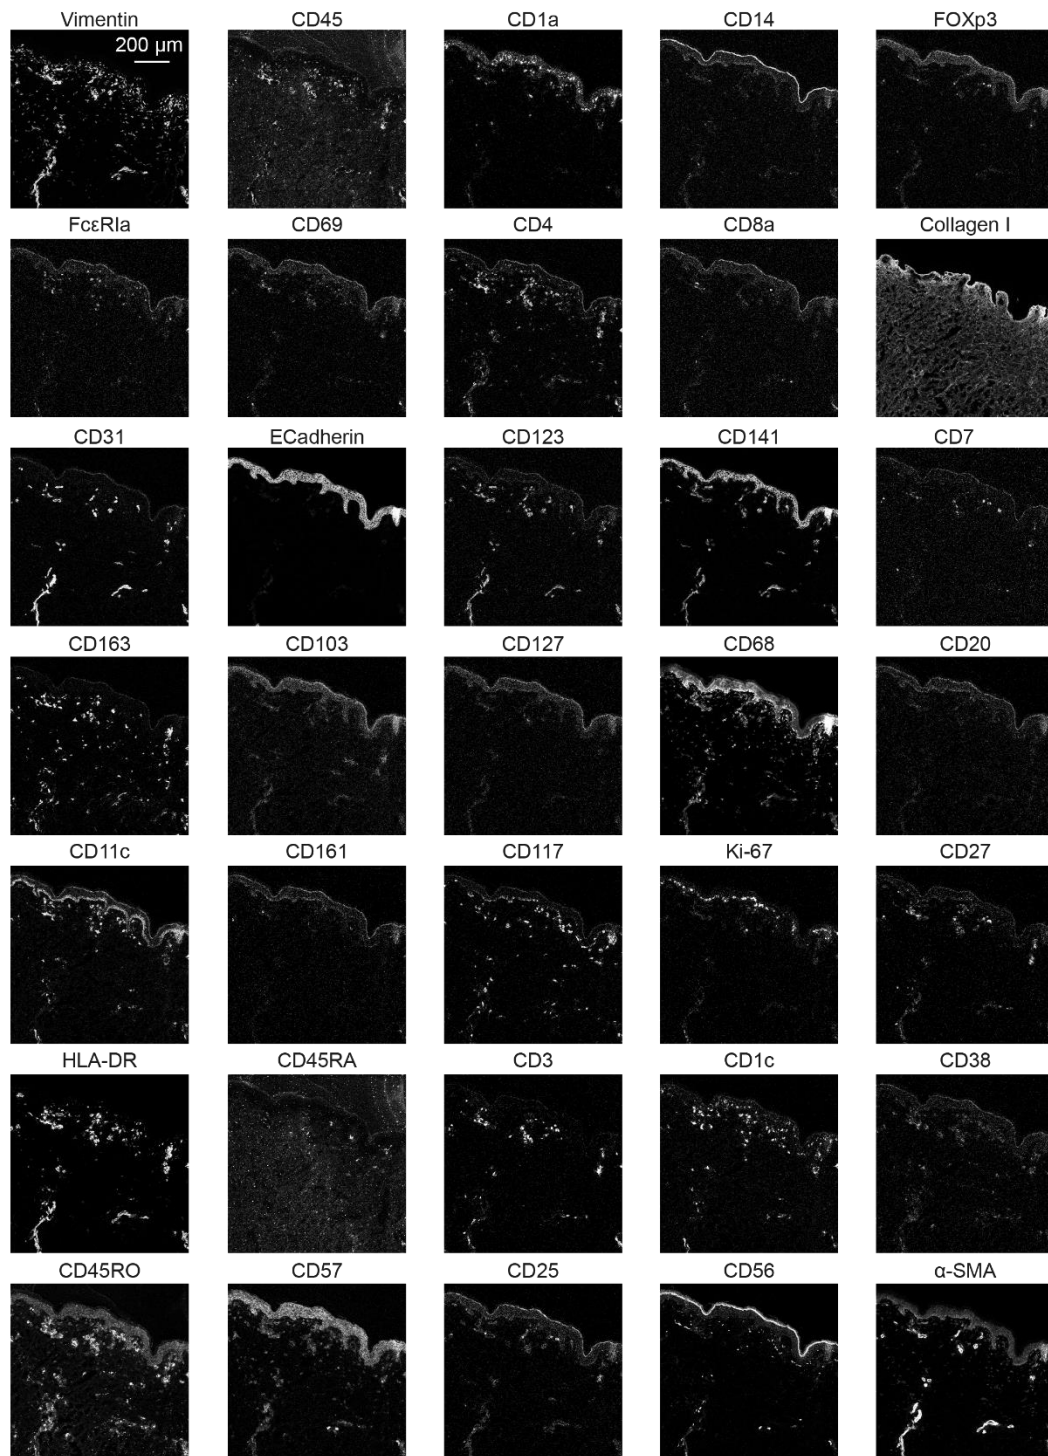

**Figure S14** Individual antibody stains for 05NS donor by IMC.

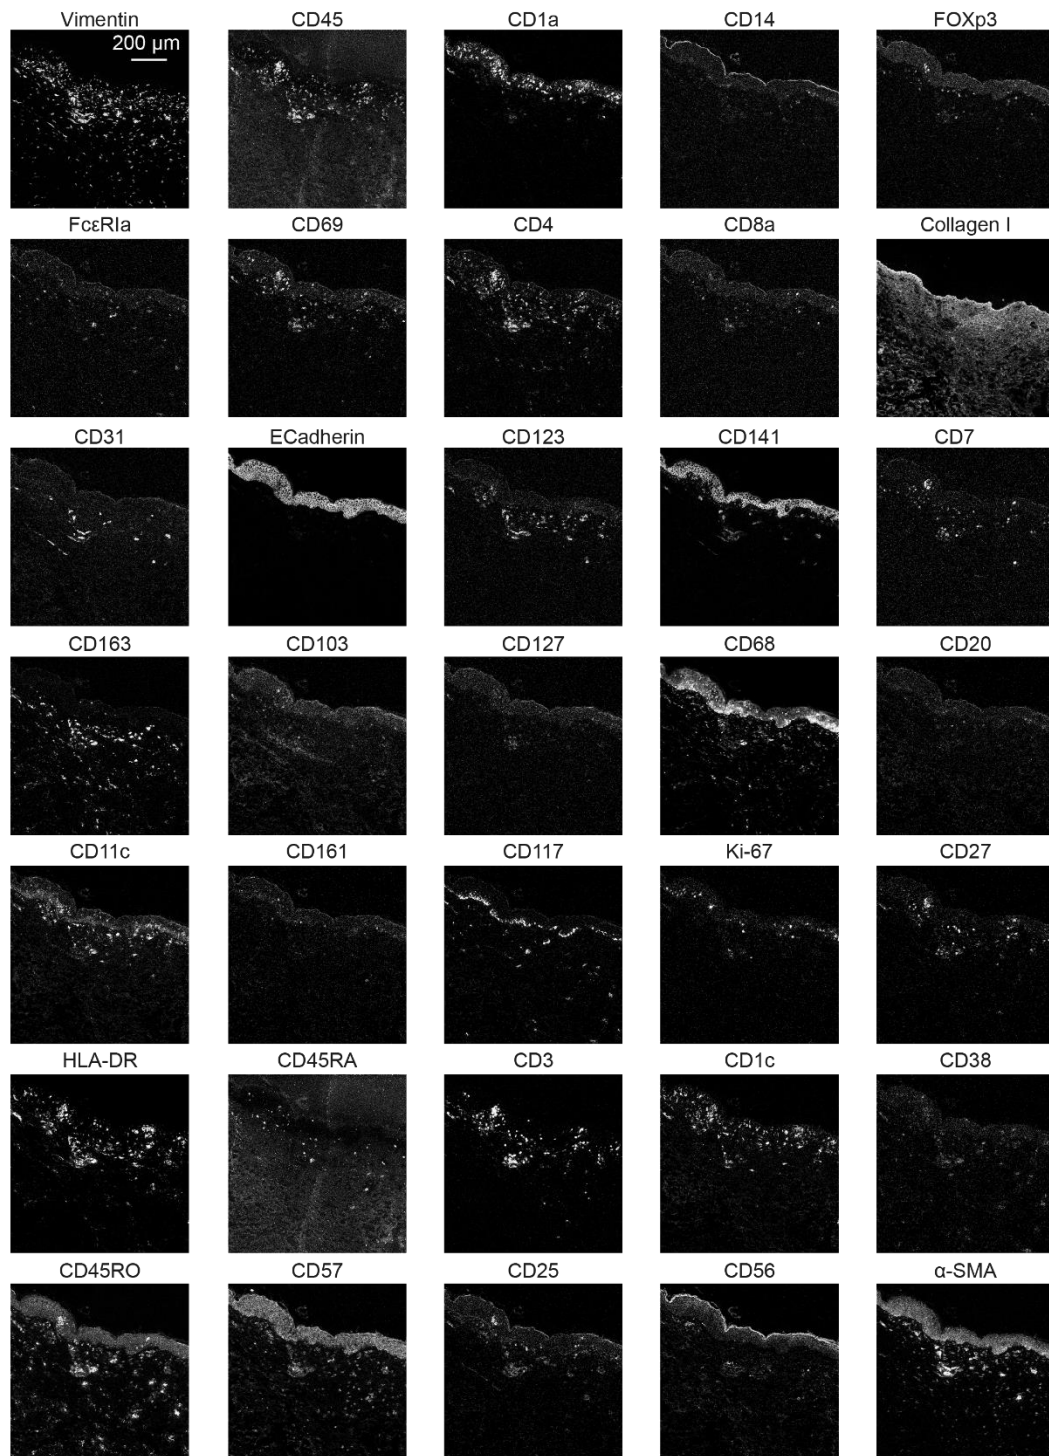

**Table S1** Characteristics of patients with Mycosis fungoides diseases.

| <b>Characteristics</b>                                                                                                                            | <b>MF patients by CyTOF (n=10)</b> | <b>MF Patients by IMC (n=6)</b> |
|---------------------------------------------------------------------------------------------------------------------------------------------------|------------------------------------|---------------------------------|
| Sex (male:female)                                                                                                                                 | 6:4                                | 4:2                             |
| Years of MF prior to biopsy<br><i>Median</i><br><i>Range</i>                                                                                      | 2<br>0-21                          | 4<br>2-8                        |
| Age at biopsy, years<br><i>Median</i><br><i>Range</i>                                                                                             | 54.5<br>34-76                      | 62.5<br>41-76                   |
| Stage at biopsy<br><i>IA</i><br><i>IB</i><br><i>IIB</i>                                                                                           | 0<br>10<br>-                       | 1<br>4<br>1                     |
| Follow-up, months<br><i>Median</i><br><i>Range</i>                                                                                                | 15<br>12-20                        | 12<br>8-20                      |
| Therapy after biopsy<br><i>Topical corticosteroids</i><br><i>UV-therapy</i><br><i>Retinoids</i><br><i>Interferon-alpha</i><br><i>Radiotherapy</i> | 10<br>5<br>2<br>1<br>1             | 6<br>-<br>-<br>-<br>1           |
| Disease course<br><i>PD</i><br><i>SD</i><br><i>PR</i><br><i>Unknown</i>                                                                           | 1<br>5<br>2<br>1                   | 0<br>5<br>1                     |

PD progressive Disease, SD stable disease, PR partial remission

**Table S2** The sex and age characteristics of the NS healthy donors.

| Heathy Donors | IMC/CyTOF | Sex    | Age |
|---------------|-----------|--------|-----|
| NS01          | IMC       | Female | 78  |
| NS02          | IMC       | Male   | 76  |
| NS03          | IMC       | Male   | 41  |
| NS04          | IMC       | Male   | 77  |
| NS05          | CyTOF     | Male   | 62  |
| NS06          | CyTOF     | Male   | 34  |
| NS07          | CyTOF     | Male   | 78  |
| NS08          | CyTOF     | Female | 68  |
| NS09          | CyTOF     | Male   | 52  |
| NS10          | CyTOF     | Male   | 62  |
| NS11          | CyTOF     | Female | 73  |
| NS12          | CyTOF     | Male   | 70  |
| NS13          | CyTOF     | Male   | 70  |
| NS14          | CyTOF     | Male   | 42  |
| NS15          | CyTOF     | Male   | 70  |
| NS16          | CyTOF     | Female | 87  |
| NS17          | CyTOF     | Male   | 74  |
| NS18          | CyTOF     | Female | 92  |
| NS19          | CyTOF     | Male   | 86  |
| NS20          | CyTOF     | Male   | 41  |
| NS21          | CyTOF     | Male   | 81  |

**Table S3** Single-cell suspension mass cytometry antibody panel.

|    | Antigen            | Tag   | Clone    | Supplier  | Cat.        | Dilution |
|----|--------------------|-------|----------|-----------|-------------|----------|
| 1  | CLA                | 104Pd | HECA-452 | Biolegend | 321302      | 1/50     |
| 2  | CD39               | 108Pd | A1       | Biolegend | 328221      | 1/50     |
| 3  | CD15               | 115In | W6D3     | Biolegend | 323035      | 1/50     |
| 4  | CCR6               | 141Pr | G034E3   | Fluidigm  | 31411003A   | 1/100    |
| 5  | CD1a               | 142Nd | HI149    | Sony      | 21100510    | 1/50     |
| 6  | CD117              | 143Nd | 104D2    | Fluidigm  | 3143001B    | 1/100    |
| 7  | CD69               | 144Nd | FN50     | Fluidigm  | 3144018B    | 1/100    |
| 8  | CD4                | 145Nd | RPA-T4   | Fluidigm  | 3145001B    | 1/100    |
| 9  | CD8a               | 146Nd | RPA-T8   | Fluidigm  | 3146001B    | 1/200    |
| 10 | CD57               | 147Sm | HNK-1    | Biolegend | 359602      | 1/200    |
| 11 | CD16               | 148Nd | 3G8      | Fluidigm  | 3148004B    | 1/100    |
| 12 | CD25               | 149Sm | 2A3      | Fluidigm  | 3149010B    | 1/100    |
| 13 | IgM                | 150Nd | MHM88    | Biolegend | 314527      | 1/100    |
| 14 | CD123              | 151Eu | 6H6      | Fluidigm  | 31511001B   | 1/100    |
| 15 | TCR $\gamma\delta$ | 152Sm | 11F2     | Fluidigm  | 31512008B   | 1/50     |
| 16 | CD7                | 153Eu | CD7-6B7  | Fluidigm  | 3153014B    | 1/100    |
| 17 | CD163              | 154Sm | GHI/61   | Fluidigm  | 3154007B    | 1/100    |
| 18 | CD103              | 155Gd | Ber-ACT8 | Biolegend | 350202      | 1/100    |
| 19 | CRTH2              | 156Gd | BM16     | Biolegend | 350102      | 1/100    |
| 20 | CD26               | 157Gd | BA5b     | Biolegend | 302702      | 1/100    |
| 21 | CD30               | 158Gd | Ber-H2   | Dako      | M075101-2   | 1/50     |
| 22 | CCR7               | 159Tb | G043H7   | Fluidigm  | 3159003A    | 1/100    |
| 23 | CD5                | 160Gd | UCHT2    | Biolegend | 300627      | 1/50     |
| 24 | KLRG-1             | 161Dy | REA261   | MACS      | 120-014-229 | 1/50     |
| 25 | CD11c              | 162Dy | Bu15     | Fluidigm  | 31612005B   | 1/200    |
| 26 | CD20               | 163Dy | 2H7      | Biolegend | 302343      | 1/200    |
| 27 | CD161              | 164Dy | HP-3G10  | Fluidigm  | 3164009B    | 1/100    |
| 28 | CD127              | 165Ho | AO19D5   | Fluidigm  | 3165008B    | 1/200    |
| 29 | CD8b               | 166Er | SID18BEE | Ebio      | 15257407    | 1/50     |
| 30 | CD27               | 167Er | O323     | Fluidigm  | 3167002B    | 1/100    |
| 31 | HLA-DR             | 168Er | L243     | Biolegend | 307651      | 1/300    |
| 32 | CD45RA             | 169Tm | HI100    | Fluidigm  | 3169008B    | 1/100    |
| 33 | CD3                | 170Er | UCHT1    | Fluidigm  | 3170001B    | 1/100    |
| 34 | CD28               | 171Yb | CD28.2   | Biolegend | 302937      | 1/100    |



|    |        |         |           |              |             |        |
|----|--------|---------|-----------|--------------|-------------|--------|
| 35 | CD38   | 172Yb   | HIT2      | Fluidigm     | 31712007B   | 1/200  |
| 36 | CD45RO | 173Yb   | UCHL1     | Biolegend    | 304239      | 1/100  |
| 37 | NKp46  | 174Yb   | 9E2       | Biolegend    | 331902      | 1/40   |
| 38 | PD-1   | 175Lu   | EH 12.2H7 | Fluidigm     | 3175008B    | 1/100  |
| 39 | CD56   | 176Yb   | NCAM16.2  | Fluidigm     | 3176008B    | 1/100  |
| 40 | CCR4   | 198Pt   | 205410    | R & D        | MAB1567-100 | 1/100  |
| 41 | CD11b  | 209Bi   | ICRF44    | Fluidigm     | 3209003B    | 1/100  |
| 42 | CD45   | 89Y     | HI30      | Fluidigm     | 3089003B    | 1/100  |
| 43 | CD14   | Qdot800 | Tük4      | ThermoFisher | Q10064      | 1/1000 |

**Table S4** Imaging mass cytometry antibody panel on frozen skin tissue.

|    | Antigen    | Tag   | Clone          | Supplier     | Cat.       | Dilution |
|----|------------|-------|----------------|--------------|------------|----------|
| 1  | CD1a       | 115In | 010            | Dako         | M357101-2  | 1/50     |
| 2  | CD14       | 141Pr | M5E2           | BioL         | 301801     | 1/50     |
| 3  | FOXP3      | 142Nd | 236A/E7        | eBioscience™ | 14-4777-82 | 1/100    |
| 4  | FcεRIα     | 143Nd | AER-37 (CRA-1) | BioL         | 334602     | 1/50     |
| 5  | CD69       | 144Nd | FN50           | FLM          | 3144018B   | 1/50     |
| 6  | CD4        | 145Nd | RPA-T4         | FLM          | 3145001B   | 1/50     |
| 7  | CD8a       | 146Nd | RPA-T8         | FLM          | 3146001B   | 1/50     |
| 8  | Collagen I | 147Sm | polyclonal     | Millipore    | AB758      | 1/100    |
| 9  | CD31       | 149Sm | 8 9C2          | CST          | CST3528BF  | 1/100    |
| 10 | ECadherin  | 150Nd | 24 E 10        | CST          | CST3195BF  | 1/50     |
| 11 | CD123      | 151Eu | 6H6            | FLM          | 3151001B   | 1/50     |
| 12 | CD141      | 152Sm | Phx-01         | BioL         | 902102     | 1/50     |
| 13 | CD7        | 153Eu | CD7-6B7        | FLM          | 3153014B   | 1/100    |
| 14 | CD163      | 154Sm | GHI/61         | FLM          | 3154007B   | 1/100    |
| 15 | CD103      | 155Gd | EPR4166        | Abcam        | ab221210   | 1/50     |
| 16 | CD127      | 156Gd | R34.34         | Beckman      | 18LIQ494   | 1/50     |
| 17 | CD68       | 159Tb | KP1            | FLM          | 3159035D   | 1/200    |
| 18 | CD20       | 161Dy | H1             | FLM          | 3161029D   | 1/50     |
| 19 | CD11c      | 162Dy | S-HCL-3        | BioL         | 125602     | 1/50     |
| 20 | CD11c      | 162Dy | Bu15           | FLM          | 3162005B   | 1/50     |
| 21 | CD161      | 164Dy | HP-3G10        | FLM          | 3164009B   | 1/50     |
| 22 | CD117      | 165Ho | 104D2          | BioL         | 313202     | 1/50     |
| 23 | Ki-67      | 166Er | D3B5           | CST          | CST9129BF  | 1/200    |
| 24 | CD27       | 167Er | O323           | FLM          | 3167002B   | 1/50     |
| 25 | HLA-DR     | 168Er | L243           | BioL         | 307651     | 1/800    |
| 26 | CD45RA     | 169Tm | HI100          | FLM          | 3169008B   | 1/100    |
| 27 | CD3        | 170Er | UCHT1          | FLM          | 3170001B   | 1/100    |
| 28 | CD1c       | 171Yb | L161           | BioL         | 331501     | 1/50     |
| 29 | CD38       | 172Yb | HIT2           | FLM          | 3172007B   | 1/100    |
| 30 | CD45RO     | 173Yb | UCHL1          | BioL         | 304239     | 1/50     |
| 31 | CD57       | 174Yb | HNK-1/Leu-7    | Abcam        | Ab212403   | 1/100    |
| 32 | CD25       | 175Lu | 24204.0        | Thermo       | MA5-23714  | 1/50     |
| 33 | CD56       | 176Yb | NCAM16.2       | FLM          | 3176008B   | 1/50     |
| 34 | αSMA       | 194Pt | 1A4            | CST          | 56856BF    | 1/100    |

|                                                                       |          |       |       |     |          |       |
|-----------------------------------------------------------------------|----------|-------|-------|-----|----------|-------|
| 35                                                                    | Vimentin | 198Pt | D21H3 | CST | 5741BF   | 1/100 |
| 36                                                                    | CD45     | 89Y   | HI30  | FLM | 3089003B | 1/50  |
| Fluidigm (Flui), Cell Signaling Technology (CST) and Biolegend (BioL) |          |       |       |     |          |       |

**Table S5.** The minimum and maximum threshold of each marker for per sample.

|         |                | NS01 |       | NS02 |       | NS03 |       | NS04 |       | 87MF |       | 105MF |       | 106MF |       | 109MF |       | 113MF |       | 120MF |       |
|---------|----------------|------|-------|------|-------|------|-------|------|-------|------|-------|-------|-------|-------|-------|-------|-------|-------|-------|-------|-------|
| Channel | Marker         | Min  | Max   | Min   | Max   | Min   | Max   | Min   | Max   | Min   | Max   | Min   | Max   |
| Y(89)   | CD45           | 3    | 7.56  | 3    | 12.69 | 3    | 6.87  | 3    | 6.54  | 2    | 17.24 | 1     | 13.42 | 1     | 14.08 | 1     | 14.63 | 1     | 9.14  | 1     | 14.95 |
| In(115) | CD1a           | 1    | 9.78  | 1    | 17.14 | 1    | 8.64  | 1    | 14.85 | 1    | 13.54 | 1     | 14.23 | 1     | 10.38 | 1     | 7.84  | 1     | 9.52  | 1     | 6.9   |
| Pr(141) | CD14           | 1    | 4.22  | 1    | 4.13  | 1    | 5.2   | 1    | 3.5   | 1    | 3.23  | 0.5   | 3.8   | 1     | 3.51  | 1     | 3.34  | 1     | 2.83  | 1     | 3.03  |
| Nd(142) | FOXP3          | 1    | 3.51  | 1    | 3.94  | 1    | 3.68  | 1    | 3.42  | 1    | 4.13  | 1     | 3.39  | 1     | 3.17  | 1     | 3.3   | 1     | 2.95  | 1.5   | 4.73  |
| Nd(143) | FceRI $\alpha$ | 1    | 3.64  | 1    | 3.52  | 1    | 3.17  | 1    | 3.06  | 1    | 4.64  | 1     | 5.73  | 1     | 4.61  | 1     | 3.48  | 1     | 5.2   | 1     | 3.59  |
| Nd(144) | CD69           | 1    | 5.96  | 1    | 6.42  | 1    | 4.19  | 1    | 5.83  | 1    | 9.07  | 1     | 7.86  | 1     | 6.69  | 1     | 12.43 | 1     | 9     | 1     | 9.13  |
| Nd(145) | CD4            | 1    | 8.12  | 1    | 9.3   | 1    | 6.28  | 1    | 6.87  | 1    | 8.82  | 1     | 11.11 | 1     | 8.22  | 1     | 10.87 | 1     | 7.79  | 1     | 7.61  |
| Nd(146) | CD8a           | 1    | 5.12  | 1    | 4.98  | 1    | 3.33  | 1    | 3.1   | 1    | 10.82 | 1     | 10    | 1     | 10    | 1     | 10    | 1     | 8     | 1     | 10    |
| Sm(147) | Collagen I     | 3    | 22.54 | 3    | 40.83 | 3    | 18.44 | 3    | 16.54 | 3    | 36.48 | 3     | 28.47 | 3     | 35.67 | 3     | 44.56 | 3     | 37.37 | 3     | 41.06 |
| Sm(149) | CD31           | 3    | 23.58 | 3    | 29.34 | 3    | 22.96 | 1    | 5.42  | 3    | 27.81 | 3     | 17.62 | 3     | 23.52 | 3     | 34.06 | 3     | 14.84 | 3     | 23.49 |
| Nd(150) | ECadherin      | 3    | 44.14 | 3    | 55.93 | 3    | 37.57 | 3    | 32.67 | 3    | 27.2  | 3     | 28.28 | 3     | 30.02 | 3     | 28.08 | 3     | 26.68 | 3     | 24.93 |
| Eu(151) | CD123          | 1    | 5.91  | 1.5  | 7.73  | 1    | 4.48  | 1    | 4.27  | 1    | 7.1   | 1     | 6.22  | 1     | 7.21  | 1     | 8.45  | 1     | 9.98  | 1     | 8.55  |
| Sm(152) | CD141          | 1    | 22.26 | 3    | 27.95 | 3    | 17.13 | 3    | 16.54 | 3    | 15.22 | 3     | 21.35 | 3     | 17.98 | 3     | 19.68 | 2     | 15.44 | 3     | 13.94 |
| Eu(153) | CD7            | 1    | 3.01  | 1    | 7.06  | 1    | 3.05  | 1    | 3.97  | 1    | 7.54  | 1     | 7.12  | 1     | 10.54 | 1     | 15.26 | 1     | 9.24  | 1     | 12.03 |
| Sm(154) | CD163          | 3    | 30.43 | 1    | 20.83 | 1    | 16.89 | 2    | 15.73 | 2    | 54.73 | 3     | 32.38 | 3     | 36.23 | 2     | 41.86 | 1     | 20.47 | 1     | 23.33 |
| Gd(155) | CD103          | 1    | 4.51  | 3    | 6.25  | 1    | 3.96  | 1    | 3.87  | 1    | 4.18  | 1     | 3.72  | 1     | 3.55  | 1     | 3.73  | 1     | 3.4   | 1     | 3.61  |
| Gd(156) | CD127          | 1    | 6.4   | 1    | 4.11  | 1    | 3.29  | 0.5  | 3.13  | 1    | 4.58  | 1     | 3.84  | 1     | 3.8   | 1     | 4.75  | 1     | 3.51  | 1     | 3.68  |
| Tb(159) | CD68           | 3    | 73.69 | 3    | 89.96 | 3    | 77.5  | 3    | 52.22 | 8    | 68.11 | 8     | 101.4 | 8     | 101.3 | 5     | 81.17 | 8     | 52.32 | 10    | 63.97 |
| Dy(161) | CD20           | 1    | 3.44  | 2    | 3.63  | 1    | 3.4   | 1    | 3.14  | 1    | 3.47  | 1     | 3.34  | 1     | 3.16  | 1     | 3.2   | 1     | 3.64  | 1     | 3.23  |
| Dy(162) | CD11c          | 3    | 9.55  | 3    | 13.65 | 3    | 8.46  | 3    | 7.06  | 3    |       | 3     | 14.13 | 3     | 12.33 | 3     | 14.89 | 2     | 13.34 | 3     | 16.88 |
| Dy(164) | CD161          | 1    | 3.61  | 1    | 4.35  | 1    | 3.36  | 1    | 3.27  | 1    | 4.22  | 1     | 4.99  | 1     | 3.59  | 1     | 4.59  | 1     | 5.24  | 1     | 4.73  |
| Ho(165) | CD117          | 1    | 13.62 | 1    | 13.62 | 1    | 11.85 | 1    | 15.73 | 1    | 15.46 | 1     | 10.99 | 1     | 13.61 | 1     | 9.14  | 1     | 9.16  | 1     | 6.33  |
| Er(166) | Ki-67          | 1    | 8.35  | 1    | 19.62 | 1    | 13.21 | 1    | 5.79  | 1    | 13.6  | 1     | 25.18 | 1     | 21.68 | 1.5   | 25.96 | 1     | 15.77 | 1.5   | 16.44 |
| Er(167) | CD27           | 1    | 4.55  | 0    | 5.45  | 1    | 6.43  | 1    | 7.31  | 1    | 10.76 | 1     | 7.14  | 1     | 6.5   | 1     | 7.57  | 1     | 6.67  | 1     | 6.73  |
| Er(168) | HLA-DR         | 3    | 44.68 | 3    | 33.07 | 3    | 39.48 | 1    | 28.32 | 2    | 31.61 | 3     | 62.1  | 3     | 36.67 | 1     | 38.63 | 2     | 29.65 | 3     | 45.24 |

|         |              |    |       |    |       |    |       |     |       |    |       |    |       |    |       |    |       |     |       |    |       |
|---------|--------------|----|-------|----|-------|----|-------|-----|-------|----|-------|----|-------|----|-------|----|-------|-----|-------|----|-------|
| Tm(169) | CD45RA       | 3  | 8.84  | 3  | 8.64  | 3  | 9.55  | 3   | 7.76  | 3  | 70.32 | 2  | 21.36 | 2  | 20.26 | 3  | 21.42 | 2   | 25.68 | 2  | 25.35 |
| Er(170) | CD3          | 1  | 25.74 | 1  | 20.68 | 1  | 16.74 | 1   | 17.71 | 1  | 29.95 | 1  | 20.8  | 1  | 25.46 | 1  | 27.53 | 1   | 18.94 | 1  | 22.41 |
| Yb(171) | CD1c         | 1  | 10.98 | 1  | 10.54 | 1  | 9.62  | 1   | 9.47  | 1  | 13.22 | 1  | 17.29 | 1  | 12.87 | 1  | 9.8   | 1   | 13.53 | 1  | 16.51 |
| Yb(172) | CD38         | 1  | 3.8   | 1  | 4.94  | 1  | 3.64  | 0.6 | 3.41  | 1  | 4.03  | 1  | 3.92  | 1  | 4.07  | 1  | 3.74  | 1   | 3.74  | 1  | 5.15  |
| Yb(173) | CD45RO       | 3  | 28.42 | 3  | 51.66 | 3  | 21.86 | 3   | 20.36 | 3  | 26.56 | 3  | 26.05 | 3  | 23.51 | 3  | 27.58 | 3   | 23.54 | 3  | 26.98 |
| Yb(174) | CD57         | 3  | 18.04 | 3  | 26.96 | 3  | 16.73 | 3   | 13.9  | 3  | 7.48  | 3  | 7.03  | 3  | 6.03  | 3  | 8.22  | 2   | 5.29  | 3  | 7.41  |
| Lu(175) | CD25         | 1  | 4.17  | 1  | 4.35  | 1  | 4.32  | 1   | 4.24  | 1  | 5.21  | 1  | 4.32  | 1  | 3.97  | 1  | 3.99  | 0.5 | 3.67  | 1  | 6.28  |
| Yb(176) | CD56         | 3  | 43.53 | 3  | 24.62 | 3  | 18.92 | 1   | 7.57  | 3  | 8.92  | 3  | 9.86  | 3  | 7.72  | 3  | 21.11 | 3   | 17.75 | 2  | 9.28  |
| Pt(194) | $\alpha$ SMA | 10 | 463.4 | 10 | 26.8  | 10 | 50.12 | 10  | 10.75 | 10 | 76.44 | 10 | 41.03 | 10 | 45.27 | 10 | 192.7 | 5   | 11.89 | 10 | 35.51 |
| Pt(198) | Vimentin     | 5  | 129.4 | 5  | 175.8 | 5  | 117.4 | 5   | 95.46 | 5  | 175.5 | 5  | 113.5 | 5  | 117.7 | 5  | 116.3 | 3   | 116.5 | 5  | 117.8 |
